# Supplementary material for: UHPLC-Q-TOF-MS/MS-oriented characteristic components dataset and multivariate statistical techniques for the holistic quality control of Usnea
Source: Royal Society of Chemistry journal article supplement (doi:10.1039/c8ra00081f), 2018-01-01
Supplement: c8ra00081f1.pdf [file c8ra00081f1.pdf]

Table S1 The Absolute Peak Areas of The 38 Compounds in 25 Batches of *Usnea* Samples

| N  | S1    | S2    | S3    | S4    | S5    | S6    | S7    | S8    | S9    | S10   | S11   | S12   | S13   | S14   | S15   | S16   | S17   | S18   | S19   | S20   | S21   | S22   | S23   | S24   | S25   |
|----|-------|-------|-------|-------|-------|-------|-------|-------|-------|-------|-------|-------|-------|-------|-------|-------|-------|-------|-------|-------|-------|-------|-------|-------|-------|
| 1  | 35680 | 39172 | 40035 | 38037 | 36082 | 36367 | 38424 | 23189 | 23378 | 24724 | 27317 | 26491 | 24765 | 25180 | 28306 | 27825 | 38232 | 38506 | 43601 | 25648 | 25960 | 24918 | 26880 | 27447 | 24682 |
| 2  | 19040 | 22620 | 22317 | 21920 | 20460 | 20477 | 22409 | 11899 | 12283 | 13031 | 15213 | 14428 | 13158 | 13856 | 16886 | 16035 | 20361 | 18639 | 21103 | 12278 | 11592 | 11617 | 13024 | 12814 | 12433 |
| 3  | 1257  | 1739  | 1717  | 2175  | 1427  | 1537  | 1382  | 1038  | 1234  | 988   | 1022  | 1010  | 1062  | 805   | 890   | 923   | 1644  | 1006  | 1093  | 1206  | 1143  | 1034  | 1039  | 1007  | 737   |
| 4  | 30981 | 28687 | 28680 | 23105 | 28528 | 31719 | 37536 | 21486 | 19984 | 26501 | 25482 | 29795 | 31263 | 31523 | 38705 | 40194 | 34758 | 30887 | 33314 | 18843 | 19029 | 19239 | 29606 | 29733 | 31801 |
| 5  | 12126 | 12507 | 12802 | 11687 | 12217 | 12503 | 12580 | 10715 | 10738 | 11002 | 11118 | 11008 | 11202 | 11118 | 11343 | 10543 | 14458 | 14361 | 13369 | 12033 | 11850 | 12168 | 12843 | 13148 | 13063 |
| 6  | 13    | 99    | 00    | 11    | 32    | 04    | 36    | 80    | 90    | 25    | 61    | 64    | 01    | 38    | 09    | 50    | 42    | 04    | 05    | 17    | 12    | 84    | 48    | 29    | 84    |
| 7  | 19744 | 23901 | 24283 | 22095 | 21499 | 22064 | 22197 | 17939 | 19542 | 20045 | 20190 | 21174 | 20814 | 20983 | 22143 | 19578 | 25440 | 22510 | 26209 | 20298 | 22058 | 21730 | 22735 | 20176 | 26175 |
| 8  | 57805 | 60316 | 64470 | 64733 | 60459 | 60892 | 62054 | 52647 | 52937 | 53406 | 53037 | 52809 | 55540 | 53298 | 55147 | 53312 | 67180 | 67162 | 70653 | 55879 | 55618 | 57160 | 57481 | 62255 | 57550 |
| 9  | 33046 | 35463 | 37682 | 37186 | 36375 | 38340 | 38762 | 34488 | 35322 | 40067 | 38437 | 37322 | 29282 | 30010 | 30788 | 32896 | 38797 | 39638 | 39084 | 38326 | 37541 | 38366 | 27294 | 32562 | 31087 |
| 10 | 1990  | 2089  | 2001  | 2013  | 1876  | 2306  | 2047  | 1440  | 1489  | 1583  | 1535  | 1588  | 1702  | 1760  | 2022  | 1995  | 2060  | 2044  | 2468  | 1316  | 1216  | 1202  | 1929  | 1624  | 2142  |
| 10 | 541   | 629   | 576   | 531   | 502   | 542   | 496   | 90    | 107   | 114   | 127   | 105   | 674   | 667   | 527   | 589   | 451   | 475   | 470   | 95    | 97    | 111   | 736   | 736   | 636   |

|    |            |       |       |       |       |       |            |       |       |       |       |       |            |            |            |            |            |            |            |       |       |       |            |            |            |
|----|------------|-------|-------|-------|-------|-------|------------|-------|-------|-------|-------|-------|------------|------------|------------|------------|------------|------------|------------|-------|-------|-------|------------|------------|------------|
| 11 | 448        | 634   | 506   | 469   | 355   | 475   | 672        | 302   | 284   | 414   | 416   | 485   | 392        | 439        | 656        | 615        | 674        | 610        | 595        | 359   | 377   | 387   | 490        | 432        | 474        |
| 12 | 491        | 630   | 521   | 530   | 437   | 426   | 420        | 287   | 282   | 193   | 182   | 239   | 348        | 288        | 323        | 258        | 393        | 434        | 382        | 230   | 276   | 313   | 342        | 363        | 378        |
| 13 | 4601       | 1328  | 2151  | 2466  | 4001  | 4695  | 6722       | 4750  | 5045  | 3780  | 3825  | 3685  | 4906       | 4386       | 5025       | 5262       | 6754       | 6184       | 7232       | 4698  | 4533  | 4277  | 4476       | 4869       | 4451       |
| 14 | 54837      | 53961 | 53789 | 53970 | 52900 | 54864 | 56587      | 6870  | 6777  | 6845  | 7007  | 6611  | 55055      | 54426      | 56599      | 59332      | 55872      | 55994      | 55630      | 6083  | 6560  | 7044  | 57524      | 57367      | 61588      |
| 15 | 234        | 140   | 129   | 143   | 178   | 170   | 151        | -     | -     | -     | -     | -     | 207        | 214        | 161        | 202        | 246        | 177        | 289        | -     | -     | -     | 225        | 239        | 328        |
| 16 | 10593<br>1 | 95757 | 99023 | 97704 | 97908 | 99852 | 10241<br>8 | 7037  | 7049  | 6916  | 6885  | 6908  | 14810<br>8 | 15043<br>7 | 15355<br>0 | 14955<br>4 | 11059<br>5 | 10409<br>7 | 10505<br>4 | 7329  | 7268  | 6795  | 16213<br>4 | 18157<br>2 | 15603<br>5 |
| 17 | 356        | 310   | 392   | 365   | 321   | 293   | 393        | -     | -     | -     | -     | -     | 502        | 445        | 491        | 553        | 358        | 330        | 399        | 23    | 23    | -     | 463        | 679        | 376        |
| 18 | 76613      | 83145 | 87247 | 81568 | 81553 | 82282 | 84816      | 71113 | 70980 | 71581 | 70653 | 70307 | 73202      | 71441      | 70447      | 74062      | 94489      | 93904      | 96067      | 75895 | 75252 | 82903 | 82392      | 80894      | 78488      |
| 19 | 2796       | 2415  | 2294  | 2464  | 2613  | 2592  | 2868       | 24575 | 24903 | 25336 | 25498 | 26187 | 1847       | 1706       | 1876       | 1989       | 2502       | 2403       | 2381       | 24349 | 23624 | 23513 | 1777       | 1556       | 1554       |
| 20 | 516        | 455   | 482   | 454   | 465   | 489   | 492        | -     | -     | -     | -     | -     | -          | -          | -          | -          | 497        | 462        | 539        | -     | -     | -     | -          | -          | -          |
| 21 | 539        | 440   | 447   | 485   | 519   | 464   | 510        | 701   | 532   | 609   | 491   | 441   | 589        | 584        | 461        | 700        | 522        | 515        | 612        | 539   | 527   | 512   | 506        | 377        | 405        |
| 22 | 473        | 428   | 416   | 430   | 499   | 461   | 464        | 681   | 504   | 585   | 489   | 441   | 499        | 494        | 446        | 695        | 504        | 474        | 470        | 501   | 467   | 506   | 457        | 374        | 390        |
| 23 | 1916       | 2001  | 2222  | 1908  | 1855  | 2200  | 2267       | 377   | 509   | 570   | 510   | 550   | 1745       | 1978       | 1892       | 2015       | 1964       | 1890       | 1955       | 549   | 580   | 549   | 1914       | 1664       | 2192       |

|    |       |       |       |       |       |       |       |       |       |       |       |       |       |       |       |       |       |       |       |       |       |       |       |       |       |
|----|-------|-------|-------|-------|-------|-------|-------|-------|-------|-------|-------|-------|-------|-------|-------|-------|-------|-------|-------|-------|-------|-------|-------|-------|-------|
| 24 | 1953  | 3268  | 3435  | 3203  | 1719  | 2120  | 2032  | 1152  | 1414  | 1314  | 1364  | 1313  | 1355  | 1493  | 1463  | 1684  | 1713  | 1873  | 2203  | 1149  | 1266  | 1221  | 1391  | 1487  | 1561  |
| 25 | 1817  | 610   | 1268  | 1871  | 2115  | 1730  | 1459  | 433   | 258   | 439   | 611   | 531   | 704   | 653   | 594   | 642   | 1129  | 1052  | 965   | 478   | 431   | 435   | 699   | 747   | 638   |
| 26 | 13013 | 12083 | 12523 | 12455 | 12383 | 12600 | 13633 | 5363  | 5394  | 5958  | 7960  | 8102  | 13395 | 13746 | 12224 | 11478 | 11996 | 12922 | 13696 | 6280  | 5732  | 5747  | 13012 | 12976 | 14127 |
| 27 | 252   | 253   | 250   | 270   | 243   | 291   | 318   | -     | -     | -     | -     | -     | -     | -     | -     | -     | 327   | 278   | 313   | -     | -     | -     | -     | -     | -     |
| 28 | 118   | 143   | 118   | 131   | 114   | 110   | 124   | -     | -     | -     | -     | -     | 141   | 131   | 117   | 129   | 119   | 128   | 115   | -     | -     | -     | 168   | 121   | 154   |
| 29 | 978   | 1020  | 1049  | 1007  | 938   | 940   | 939   | 1006  | 963   | 917   | 864   | 868   | 835   | 875   | 814   | 904   | 960   | 959   | 1034  | 1208  | 1203  | 1107  | 1040  | 956   | 1041  |
| 30 | 978   | 1020  | 1049  | 1007  | 938   | 940   | 941   | 1761  | 846   | 2180  | 2212  | 2198  | 837   | 879   | 816   | 904   | 962   | 963   | 1034  | 1389  | 2227  | 2425  | 1037  | 965   | 1043  |
| 31 | 157   | 244   | 253   | 256   | 159   | 225   | 145   | 323   | 298   | 415   | 384   | 419   | 166   | 162   | 156   | 163   | 181   | 190   | 222   | 278   | 287   | 301   | 135   | 110   | 111   |
| 32 | 586   | 439   | 465   | 482   | 567   | 729   | 767   | -     | -     | -     | -     | -     | 344   | 347   | 194   | 218   | 715   | 798   | 866   | -     | -     | -     | 273   | 178   | 288   |
| 33 | 11438 | 11586 | 11415 | 11263 | 10923 | 11356 | 12118 | 7843  | 7780  | 7724  | 7773  | 8274  | 10492 | 11085 | 11364 | 11372 | 12485 | 12544 | 12312 | 7405  | 6722  | 8414  | 12680 | 11974 | 13994 |
|    | 1     | 7     | 9     | 0     | 5     | 2     | 6     |       |       |       |       |       | 5     | 0     | 9     | 4     | 4     | 5     | 7     |       |       |       | 5     | 7     | 5     |
| 34 | 1009  | 1002  | 1017  | 1020  | 957   | 1105  | 1061  | 423   | 515   | 483   | 447   | 432   | 791   | 843   | 709   | 672   | 987   | 985   | 1031  | 463   | 466   | 434   | 678   | 657   | 706   |
| 35 | 12815 | 12762 | 13008 | 12939 | 12615 | 13193 | 13272 | 20554 | 20800 | 21572 | 21421 | 21462 | 8753  | 8745  | 8924  | 8977  | 13374 | 13232 | 13220 | 22056 | 21650 | 21004 | 9591  | 9180  | 9800  |
|    |       |       |       |       |       |       |       | 9     | 6     | 4     | 4     | 9     |       |       |       |       |       |       |       | 0     | 2     | 5     |       |       |       |
| 36 | 94654 | 89370 | 92577 | 93948 | 90535 | 93521 | 97430 | 96958 | 98875 | 10178 | 99102 | 97698 | 96349 | 98218 | 97258 | 98355 | 10566 | 10791 | 10698 | 93526 | 91473 | 11089 | 11050 | 10568 | 11324 |
|    | 9     | 7     | 9     | 2     | 3     | 8     | 7     |       |       | 8     |       |       | 9     | 7     | 5     | 5     | 04    | 52    | 95    |       |       | 7     | 16    | 28    | 89    |

|    |       |       |       |       |       |       |       |      |      |      |      |      |       |       |       |       |       |       |       |      |      |      |       |       |       |
|----|-------|-------|-------|-------|-------|-------|-------|------|------|------|------|------|-------|-------|-------|-------|-------|-------|-------|------|------|------|-------|-------|-------|
| 37 | 25424 | 22781 | 24047 | 23910 | 23996 | 24152 | 24805 | 1458 | 1452 | 1440 | 1449 | 1430 | 37229 | 37650 | 38660 | 37890 | 26895 | 25309 | 25621 | 1434 | 1443 | 1424 | 41500 | 46530 | 39497 |
| 38 | 4975  | 4727  | 4509  | 4694  | 4853  | 4897  | 5150  | 1275 | 1239 | 1882 | 1269 | 1848 | 9699  | 9977  | 9998  | 9976  | 4783  | 4957  | 5055  | 2848 | 1299 | 1312 | 9981  | 10857 | 10419 |

---

*Note:* not detected.

Table S2 The Relative Peak Areas (RPAs) of The 38 Compounds in the 25 Batches of *Usnea* Samples

| No. | S1   | S2   | S3   | S4   | S5   | S6   | S7   | S8   | S9   | S10  | S11  | S12  | S13  | S14  | S15  | S16  | S17  | S18  | S19  | S20  | S21  | S22  | S23  | S24  | S25  |
|-----|------|------|------|------|------|------|------|------|------|------|------|------|------|------|------|------|------|------|------|------|------|------|------|------|------|
| 1   | 1.00 | 1.10 | 1.12 | 1.07 | 1.01 | 1.02 | 1.08 | 0.65 | 0.66 | 0.69 | 0.77 | 0.74 | 0.69 | 0.71 | 0.79 | 0.78 | 1.07 | 1.08 | 1.22 | 0.72 | 0.73 | 0.70 | 0.75 | 0.77 | 0.69 |
| 2   | 1.00 | 1.19 | 1.17 | 1.15 | 1.07 | 1.08 | 1.18 | 0.62 | 0.65 | 0.68 | 0.80 | 0.76 | 0.69 | 0.73 | 0.89 | 0.84 | 1.07 | 0.98 | 1.11 | 0.64 | 0.61 | 0.61 | 0.68 | 0.67 | 0.65 |
| 3   | 1.00 | 1.38 | 1.37 | 1.73 | 1.14 | 1.22 | 1.10 | 0.83 | 0.98 | 0.79 | 0.81 | 0.80 | 0.84 | 0.64 | 0.71 | 0.73 | 1.31 | 0.80 | 0.87 | 0.96 | 0.91 | 0.82 | 0.83 | 0.80 | 0.59 |
| 4   | 1.00 | 0.93 | 0.93 | 0.75 | 0.92 | 1.02 | 1.21 | 0.69 | 0.65 | 0.86 | 0.82 | 0.96 | 1.01 | 1.02 | 1.25 | 1.30 | 1.12 | 1.00 | 1.08 | 0.61 | 0.61 | 0.62 | 0.96 | 0.96 | 1.03 |
| 5   | 1.00 | 1.03 | 1.06 | 0.96 | 1.01 | 1.03 | 1.04 | 0.88 | 0.89 | 0.91 | 0.92 | 0.91 | 0.92 | 0.92 | 0.94 | 0.87 | 1.19 | 1.18 | 1.10 | 0.99 | 0.98 | 1.00 | 1.06 | 1.08 | 1.08 |
| 6   | 1.00 | 1.21 | 1.23 | 1.12 | 1.09 | 1.12 | 1.12 | 0.91 | 0.99 | 1.02 | 1.02 | 1.07 | 1.05 | 1.06 | 1.12 | 0.99 | 1.29 | 1.14 | 1.33 | 1.03 | 1.12 | 1.10 | 1.15 | 1.02 | 1.33 |
| 7   | 1.00 | 1.04 | 1.12 | 1.12 | 1.05 | 1.05 | 1.07 | 0.91 | 0.92 | 0.92 | 0.92 | 0.91 | 0.96 | 0.92 | 0.95 | 0.92 | 1.16 | 1.16 | 1.22 | 0.97 | 0.96 | 0.99 | 0.99 | 1.08 | 1.00 |
| 8   | 1.00 | 1.07 | 1.14 | 1.13 | 1.10 | 1.16 | 1.17 | 1.04 | 1.07 | 1.21 | 1.16 | 1.13 | 0.89 | 0.91 | 0.93 | 1.00 | 1.17 | 1.20 | 1.18 | 1.16 | 1.14 | 1.16 | 0.83 | 0.99 | 0.94 |
| 9   | 1.00 | 1.05 | 1.01 | 1.01 | 0.94 | 1.16 | 1.03 | 0.72 | 0.75 | 0.80 | 0.77 | 0.80 | 0.86 | 0.88 | 1.02 | 1.00 | 1.04 | 1.03 | 1.24 | 0.66 | 0.61 | 0.60 | 0.97 | 0.82 | 1.08 |
| 10  | 1.00 | 1.16 | 1.06 | 0.98 | 0.93 | 1.00 | 0.92 | 0.17 | 0.20 | 0.21 | 0.23 | 0.19 | 1.25 | 1.23 | 0.97 | 1.09 | 0.83 | 0.88 | 0.87 | 0.18 | 0.18 | 0.21 | 1.36 | 1.36 | 1.18 |
| 11  | 1.00 | 1.42 | 1.13 | 1.05 | 0.79 | 1.06 | 1.50 | 0.67 | 0.63 | 0.92 | 0.93 | 1.08 | 0.88 | 0.98 | 1.46 | 1.37 | 1.50 | 1.36 | 1.33 | 0.80 | 0.84 | 0.86 | 1.09 | 0.96 | 1.06 |
| 12  | 1.00 | 1.28 | 1.06 | 1.08 | 0.89 | 0.87 | 0.86 | 0.58 | 0.57 | 0.39 | 0.37 | 0.49 | 0.71 | 0.59 | 0.66 | 0.53 | 0.80 | 0.88 | 0.78 | 0.47 | 0.56 | 0.64 | 0.70 | 0.74 | 0.77 |
| 13  | 1.00 | 0.29 | 0.47 | 0.54 | 0.87 | 1.02 | 1.46 | 1.03 | 1.10 | 0.82 | 0.83 | 0.80 | 1.07 | 0.95 | 1.09 | 1.14 | 1.47 | 1.34 | 1.57 | 1.02 | 0.99 | 0.93 | 0.97 | 1.06 | 0.97 |
| 14  | 1.00 | 0.98 | 0.98 | 0.98 | 0.96 | 1.00 | 1.03 | 0.13 | 0.12 | 0.12 | 0.13 | 0.12 | 1.00 | 0.99 | 1.03 | 1.08 | 1.02 | 1.02 | 1.01 | 0.11 | 0.12 | 0.13 | 1.05 | 1.05 | 1.12 |
| 15  | 1.00 | 0.60 | 0.55 | 0.61 | 0.76 | 0.73 | 0.65 | 0.00 | 0.00 | 0.00 | 0.00 | 0.00 | 0.88 | 0.91 | 0.69 | 0.86 | 1.05 | 0.76 | 1.24 | 0.00 | 0.00 | 0.00 | 0.96 | 1.02 | 1.40 |
| 16  | 1.00 | 0.90 | 0.93 | 0.92 | 0.92 | 0.94 | 0.97 | 0.07 | 0.07 | 0.07 | 0.06 | 0.07 | 1.40 | 1.42 | 1.45 | 1.41 | 1.04 | 0.98 | 0.99 | 0.07 | 0.07 | 0.06 | 1.53 | 1.71 | 1.47 |
| 17  | 1.00 | 0.87 | 1.10 | 1.03 | 0.90 | 0.82 | 1.10 | 0.00 | 0.00 | 0.00 | 0.00 | 0.00 | 1.41 | 1.25 | 1.38 | 1.55 | 1.01 | 0.93 | 1.12 | 0.06 | 0.06 | 0.00 | 1.30 | 1.91 | 1.06 |
| 18  | 1.00 | 1.09 | 1.14 | 1.06 | 1.06 | 1.07 | 1.11 | 0.93 | 0.93 | 0.93 | 0.92 | 0.92 | 0.96 | 0.93 | 0.92 | 0.97 | 1.23 | 1.23 | 1.25 | 0.99 | 0.98 | 1.08 | 1.08 | 1.06 | 1.02 |
| 19  | 1.00 | 0.86 | 0.82 | 0.88 | 0.93 | 0.93 | 1.03 | 8.79 | 8.91 | 9.06 | 9.12 | 9.37 | 0.66 | 0.61 | 0.67 | 0.71 | 0.89 | 0.86 | 0.85 | 8.71 | 8.45 | 8.41 | 0.64 | 0.56 | 0.56 |
| 20  | 1.00 | 0.88 | 0.93 | 0.88 | 0.90 | 0.95 | 0.95 | 0.00 | 0.00 | 0.00 | 0.00 | 0.00 | 0.00 | 0.00 | 0.00 | 0.00 | 0.96 | 0.90 | 1.04 | 0.00 | 0.00 | 0.00 | 0.00 | 0.00 | 0.00 |
| 21  | 1.00 | 0.82 | 0.83 | 0.90 | 0.96 | 0.86 | 0.95 | 1.30 | 0.99 | 1.13 | 0.91 | 0.82 | 1.09 | 1.08 | 0.86 | 1.30 | 0.97 | 0.96 | 1.14 | 1.00 | 0.98 | 0.95 | 0.94 | 0.70 | 0.75 |
| 22  | 1.00 | 0.90 | 0.88 | 0.91 | 1.05 | 0.97 | 0.98 | 1.44 | 1.07 | 1.24 | 1.03 | 0.93 | 1.05 | 1.04 | 0.94 | 1.47 | 1.07 | 1.00 | 0.99 | 1.06 | 0.99 | 1.07 | 0.97 | 0.79 | 0.82 |
| 23  | 1.00 | 1.04 | 1.16 | 1.00 | 0.97 | 1.15 | 1.18 | 0.20 | 0.27 | 0.30 | 0.27 | 0.29 | 0.91 | 1.03 | 0.99 | 1.05 | 1.03 | 0.99 | 1.02 | 0.29 | 0.30 | 0.29 | 1.00 | 0.87 | 1.14 |
| 24  | 1.00 | 1.67 | 1.76 | 1.64 | 0.88 | 1.09 | 1.04 | 0.59 | 0.72 | 0.67 | 0.70 | 0.67 | 0.69 | 0.76 | 0.75 | 0.86 | 0.88 | 0.96 | 1.13 | 0.59 | 0.65 | 0.63 | 0.71 | 0.76 | 0.80 |



Table S3 The Component Matrix of the First Two Principal Components

| Compound | Principal component |        |
|----------|---------------------|--------|
|          | PC1                 | PC2    |
| c33      | <b>0.982</b>        | -0.171 |
| c23      | <b>0.976</b>        | -0.100 |
| c35      | <b>-0.975</b>       | 0.191  |
| c14      | <b>0.973</b>        | -0.214 |
| c19      | <b>-0.973</b>       | 0.196  |
| c36      | <b>0.973</b>        | -0.215 |
| c26      | <b>0.953</b>        | -0.199 |
| c28      | <b>0.947</b>        | -0.255 |
| c34      | <b>0.906</b>        | 0.320  |
| c10      | <b>0.890</b>        | -0.371 |
| c15      | <b>0.889</b>        | -0.311 |
| c9       | <b>0.880</b>        | 0.102  |
| c32      | <b>0.862</b>        | 0.347  |
| c17      | <b>0.858</b>        | -0.431 |
| c16      | <b>0.847</b>        | -0.515 |
| c37      | <b>0.830</b>        | -0.538 |
| c30      | <b>-0.803</b>       | 0.231  |
| c31      | <b>-0.783</b>       | 0.434  |
| c12      | <b>0.745</b>        | 0.411  |

|     |              |              |
|-----|--------------|--------------|
| c1  | <b>0.725</b> | 0.649        |
| c2  | <b>0.718</b> | 0.577        |
| c7  | <b>0.713</b> | 0.536        |
| c4  | <b>0.706</b> | -0.343       |
| c27 | <b>0.684</b> | 0.688        |
| c20 | <b>0.681</b> | 0.685        |
| c11 | <b>0.670</b> | 0.091        |
| c38 | <b>0.645</b> | -0.740       |
| c18 | <b>0.642</b> | 0.524        |
| c25 | <b>0.632</b> | 0.402        |
| 5   | <b>0.620</b> | 0.351        |
| 24  | <b>0.604</b> | 0.526        |
| 6   | <b>0.594</b> | 0.286        |
| 8   | -0.218       | <b>0.858</b> |
| 3   | 0.339        | <b>0.703</b> |
| 29  | -0.203       | 0.398        |
| 22  | -0.410       | 0.154        |
| 13  | 0.160        | 0.146        |
| 21  | -0.266       | 0.143        |

---
